# Supplementary material
Source: Springer Nature journal article supplement (https://www.springermedizin.de/resource/supplementary/12955_2007_426_MOESM3_ESM.pdf/9560414)

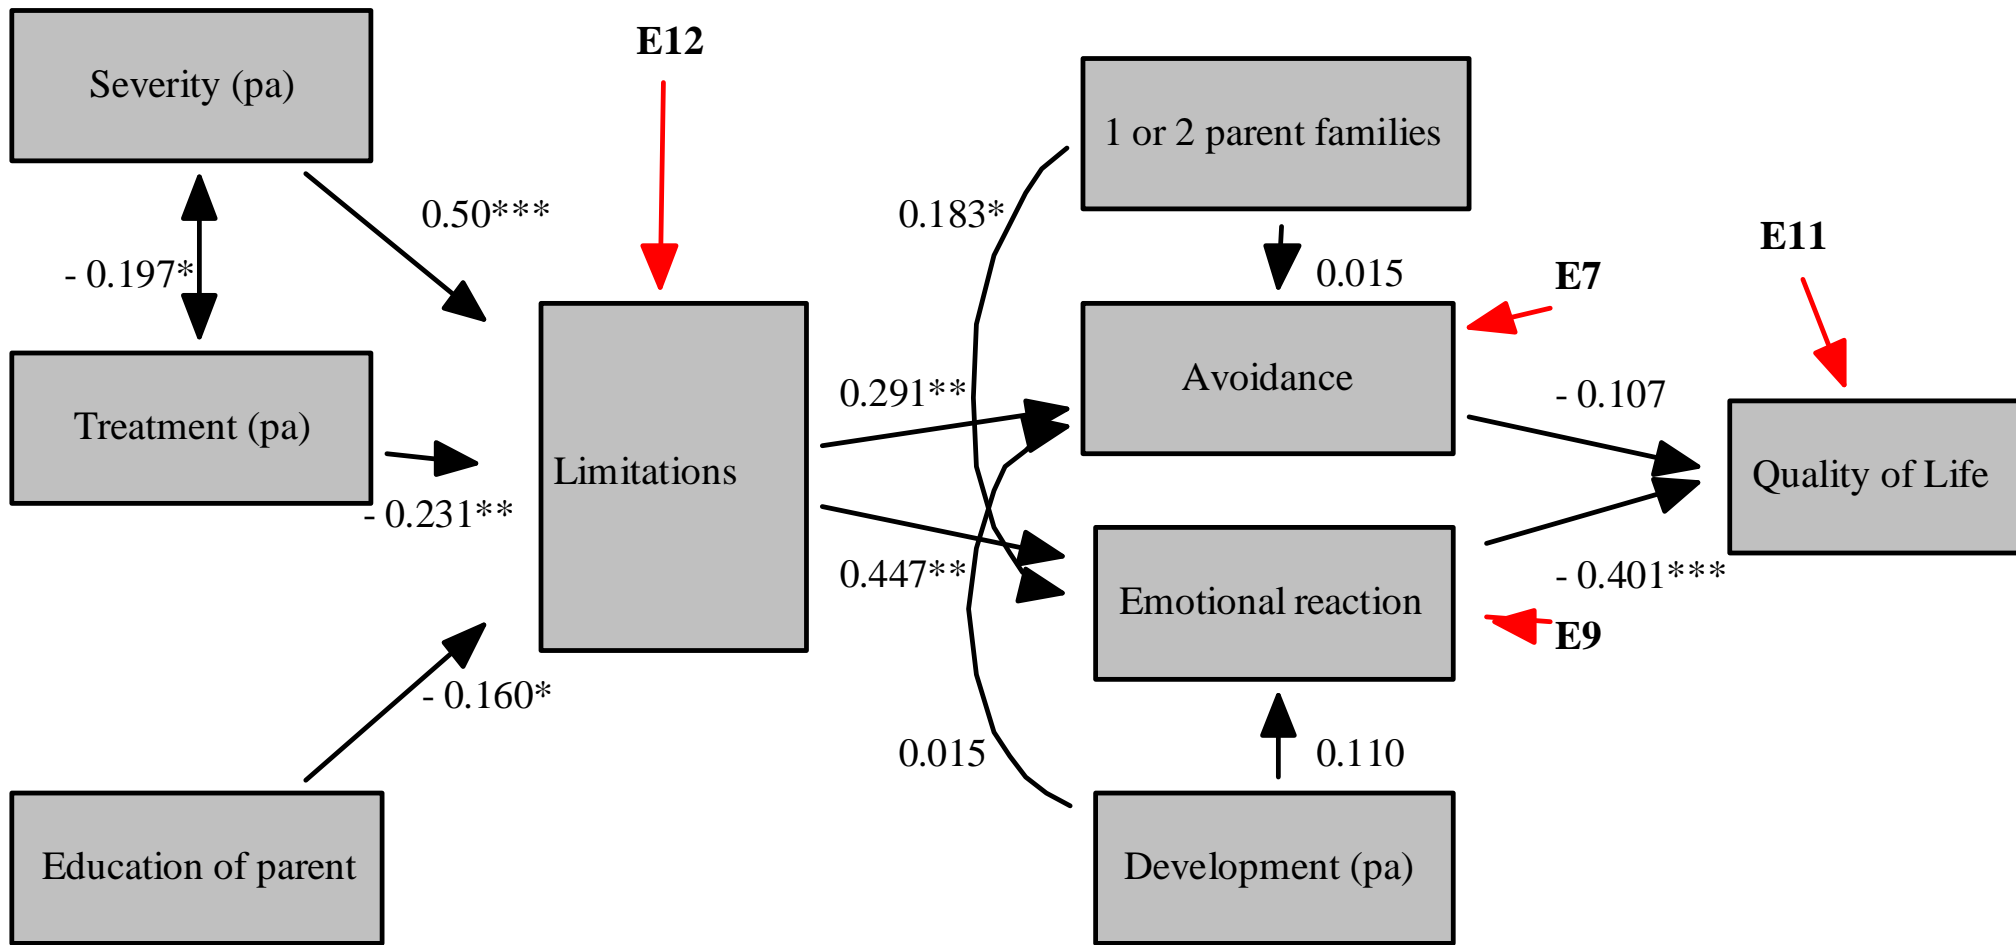

Supplement: MOESM3 [file 9560414]
